# Supplementary material
Source: MDPI journal article supplement (https://www.mdpi.com/2227-7390/10/11/1848)
Supplement: s1 [file s1]

## Statistical Comparison between the Neural Network and Linear Model Performance

Correlation

| Epoch  | $\chi^2$ | DF | N  | $p$     |
|--------|----------|----|----|---------|
| 400ms  | 26.86    | 1  | 32 | <0.0001 |
| 700ms  | 32.56    | 1  | 32 | <0.0001 |
| 1400ms | 47.27    | 1  | 32 | <0.0001 |
| 2800ms | 37.32    | 1  | 32 | <0.0001 |

Maximum Absolute Value

| Epoch  | $\chi^2$ | DF | N  | $p$     |
|--------|----------|----|----|---------|
| 400ms  | 21.95    | 1  | 32 | <0.0001 |
| 700ms  | 33.18    | 1  | 32 | <0.0001 |
| 1400ms | 46.16    | 1  | 32 | <0.0001 |
| 2800ms | 39.48    | 1  | 32 | <0.0001 |

$R^2$

| Epoch  | $\chi^2$ | DF | N  | $p$     |
|--------|----------|----|----|---------|
| 400ms  | 31.50    | 1  | 32 | <0.0001 |
| 700ms  | 37.98    | 1  | 32 | <0.0001 |
| 1400ms | 47.26    | 1  | 32 | <0.0001 |
| 2800ms | 41.71    | 1  | 32 | <0.0001 |

*Note: The values in the tables are uncorrected.*
